# Supplementary material
Source: HighWire-hosted journal article supplement (https://erj.ersjournals.com/content/54/4/1802194)
Supplement: inline-supplementary-material-1 [file inline-supplementary-material-1.pdf]

# Outdoor Air Pollution and the Burden of Childhood Asthma across Europe

Haneen Khreis<sup>1, 2, 3, 4</sup>, Marta Cirach<sup>2, 3, 4</sup>, Natalie Mueller<sup>2, 3, 4</sup>, Kees de Hoogh<sup>5, 6</sup>, Gerard Hoek<sup>7</sup>, Mark J Nieuwenhuijsen<sup>2, 3, 4</sup> and David Rojas-Rueda<sup>2, 3, 8</sup>

<sup>1</sup> Center for Advancing Research in Transportation Emissions, Energy, and Health (CARTEEH), Texas A&M Transportation Institute (TTI), Texas, USA, <sup>2</sup> ISGlobal, Centre for Research in Environmental Epidemiology (CREAL), Barcelona, Spain, <sup>3</sup> Universitat Pompeu Fabra (UPF), Barcelona, Spain, <sup>4</sup> CIBER Epidemiologia y Salud Publica (CIBERESP), Madrid, Spain, <sup>5</sup> Swiss Tropical and Public Health Institute, Basel, Switzerland, <sup>6</sup> University of Basel, Basel, Switzerland, <sup>7</sup> Division of Environmental Epidemiology, Institute for Risk Assessment Sciences, Utrecht University, Utrecht, Netherlands, <sup>8</sup> Environmental and Radiological Health Sciences, Colorado State University, Fort Collins, USA.

**Address correspondence to:** Haneen Khreis, Center for Advancing Research in Transportation Emissions, Energy, and Health (CARTEEH), Texas A&M Transportation Institute (TTI), 2929 Research Parkway, 3135 TAMU, College Station, TX 77843-3135, Direct: 979.458.9857, Email: [H-Khreis@tti.tamu.edu](mailto:H-Khreis@tti.tamu.edu) and David Rojas-Rueda, Environmental and Radiological Health Sciences, Colorado State University, Fort Collins, USA. Email: [david.rojas@colostate.edu](mailto:david.rojas@colostate.edu)

## Supplementary Material - Datasets and Methods

### **Census data**

The total population count at the 1 km x 1 km grid cell unit was extracted from the GEOSTAT 2011 population grid (V2.0.1) database (Eurostat EFGS, 2011). This database was a joint initiative between Eurostat and European Forum for Geography and Statistics (EFGS), which contains national population grid information for European countries. The GEOSTAT database did not specifically include childhood population counts. To calculate the childhood population count in each grid, which was our population of interest, the percentage of people aged 1 to 14 years old was extracted from the NUTS 3 dataset (Nomenclature of Territorial Units for Statistics, Eurostat, European Commission, version 2010) at the regional scale, which are the smallest available regions for statistical purposes. The NUTS classification is a hierarchical system for dividing the economic territory of the European Union for different purposes. NUTS 3 level contains 1,566 regions within European countries and represents the regional unit for socio-economic statistics. We multiplied the percentage of people aged 1 to 14 from each region by the total population count, as extracted from the GEOSTAT population grid database, to calculate the childhood population count at the 1 km x 1 km grid cell scale. Unfortunately, at the 1 km x 1 km scale of our analysis, we had no source of data on childhood population count from age 0 to 18 years old. The older childhood group (>14 to 18 years old) was mixed with adults (15-29), and as such we performed our analysis exclusively for the age group 1 to 14 years old. We also stratified our analysis by age and present results for young children under 5 years old and children aged 5-14 years old.

### **Exposure assessment model and data**

Childhood exposures to NO<sub>2</sub>, PM<sub>2.5</sub> and BC were assessed at the 1 km x 1 km scale using a validated LUR model, which is described next. LUR modeling is an increasingly popular empirical air pollution modeling technique which uses predictor variables such as land-use, geographic, road and traffic characteristics to explain spatial variations of measured air pollution concentrations at multiple sites across the study area [25].

The set of LUR models we use comes from work reported in de Hoogh, Chen [24], where the authors modeled NO<sub>2</sub>, PM<sub>2.5</sub> and BC annual mean 2010 exposures at the 100 m x 100 m grid cell scale. The LUR models were developed on the full monitoring data set (100%) and a robust validation was performed by developing five hold-out-validation models (on 80% of sites) and comparing the measured concentrations against the predictions at the five (20% each) hold-out samples. Another difference with the original founding LUR models reported in previous work by de Hoogh, Gulliver [45] was the additional step in the PM<sub>2.5</sub> model's development to explain the residual spatial variation at urban and rural background sites only, using ordinary kriging.

*For NO<sub>2</sub>*, the final model adopted included the following predictor variables: chemical transport model estimates, all roads (50, 300 and 2000m), major roads (100m), natural area (400m), ports (700m) and residential area (300m). The adjusted R<sup>2</sup> of this model equaled 0.59 whilst the hold-out-validation R<sup>2</sup> equaled 0.58. *For PM<sub>2.5</sub>*, the final model adopted included the following predictor variables: satellite and chemical transport model estimates, all roads (100m), natural area (50m), ports (800m), residential area (200m) and altitude and additional ordinary kriging was applied to the residuals. The adjusted R<sup>2</sup> of this model equaled 0.72 (0.62 before kriging) whilst the hold-out-validation R<sup>2</sup> equaled 0.66 (0.59 before kriging). *For BC*, the final model adopted included the following predictor variables: satellite and chemical transport model estimates, length of major roads within 100m, all roads (50 and 700m), residential area (3000m), urban green (1000m) and latitude.

The adjusted  $R^2$  of this model equaled 0.54 whilst the hold-out-validation  $R^2$  equaled 0.51. Full detail on these models' development and performance/validation can be found in de Hoogh, Chen [24]. All three models were used to estimate  $\text{NO}_2$ ,  $\text{PM}_{2.5}$  exposures (in  $\mu\text{g}/\text{m}^3$ ), and BC (in  $10^{-5} \text{ m}^{-1}$ ), at the 100 m x 100 m grid cell scale, across the 18 countries in our study area (section 2.1).

### **Matching of census and exposure data**

To match the childhood population data with the exposure estimates, the  $\text{NO}_2$ ,  $\text{PM}_{2.5}$  and BC exposure estimates from the LUR model (section 2.3) were averaged up from the 100 m x 100 m grid cell to the 1 km x 1 km grid cell, as this was the finest scale at which census population data was available.

Therefore, for each 1 km x 1 km grid cell across our study area, an average exposure estimate was calculated, based on all the 100 m x 100 m grid cells contained within each 1 km x 1 km grid cell.

This average exposure estimate was then assigned to all children who lived within that 1 km x 1 km grid cell. There were 1,540,386 1 km x 1 km grid cells across the 18 included countries which had complete data, and which we included in our analysis. The exposure and population characteristics in these 1 km x 1 km grid cells are shown in Table S1, below.

**Table S1 Population and exposure characteristics at the 1 km x 1 km grid cells across the 18 selected countries**

| Population characteristics                                                                                                |                             |            |
|---------------------------------------------------------------------------------------------------------------------------|-----------------------------|------------|
| Number of total 1 km x 1 km grid cells across the 18 selected countries (with complete population and air pollution data) | 1,540,386                   |            |
| Total number of children in all included 1 km x 1 km grid cells (1 – 14y.o.)                                              | 63,4 M                      |            |
| Average number of children in all included 1 km x 1 km grid cells (1 – 14 y.o.)                                           | 43                          |            |
| Minimum number of children in any included 1 km x 1 km grid cell (1 – 14 y.o.)                                            | 1                           |            |
| Maximum number of children in any included 1 km x 1 km grid cell (1 – 14 y.o.)                                            | 8,141                       |            |
| Exposure characteristics                                                                                                  |                             |            |
| NO <sub>2</sub> (µg/m <sup>3</sup> )                                                                                      | Mean (sd)                   | 11.8 (6.7) |
|                                                                                                                           | Minimum                     | 1.4        |
|                                                                                                                           | 25 <sup>th</sup> percentile | 7.0        |
|                                                                                                                           | Median                      | 10.6       |
|                                                                                                                           | 75 <sup>th</sup> percentile | 15.4       |
|                                                                                                                           | Maximum                     | 70.0       |
| PM <sub>2.5</sub> (µg/m <sup>3</sup> )                                                                                    | Mean (sd)                   | 11.6 (4.6) |
|                                                                                                                           | Minimum                     | 2.0        |
|                                                                                                                           | 25 <sup>th</sup> percentile | 8.2        |
|                                                                                                                           | Median                      | 12.1       |
|                                                                                                                           | 75 <sup>th</sup> percentile | 14.5       |
|                                                                                                                           | Maximum                     | 41.1       |
| BC (10 <sup>-5</sup> m <sup>-1</sup> )                                                                                    | Mean (sd)                   | 1.0 (0.5)  |
|                                                                                                                           | Minimum                     | 0.003      |
|                                                                                                                           | 25 <sup>th</sup> percentile | 0.7        |
|                                                                                                                           | Median                      | 1.2        |
|                                                                                                                           | 75 <sup>th</sup> percentile | 1.4        |
|                                                                                                                           | Maximum                     | 3.7        |

Abbreviations: NO<sub>2</sub>: Nitrogen Dioxide; PM<sub>2.5</sub>: Particulate Matter equal or less than 2.5 micrometers in diameter; BC: PM<sub>2.5</sub> absorbance/ black carbon; km: kilometers; y.o.: years old; sd: standard deviation

### **Baseline childhood asthma incidence rates**

Incidence rates were extracted at the country level for the year 2016, which, at the time of this analysis, was the latest and theoretically the best available assessment as more input data became available in recent years. The GBD data uses public and official health data records reported from health surveys and clinical records. Between year 2010 (the year of the air pollution exposure assessment) and year 2016 (the year of the asthma incidence rates assessment), the average childhood asthma incidence rate across the 18 included countries decreased by 2% (Global Burden of Disease Collaborative Network, 2016). Additional information can be found at GHDx (<http://ghdx.healthdata.org/gbd-results-tool>).

Incidence rates in the age group 1-4 and 5-14 years old, were directly provided by the GBD, and no further analysis was required to establish the baseline asthma incidence rates used in the age-stratified analyses. For the wider age group 1-14 years old, the GBD did not directly provide the incidence rate for this specific group. Instead, we estimated the number of cases in the 1-4 and 5-14 years old age groups and summed these cases to represent the burden in the age group 1-14 years old.

**Table S2 Baseline childhood asthma incidence rates by country, source: (Global Burden of Disease Collaborative Network, 2016)**

| <b>Country</b> | <b>Childhood asthma incidence rate 1-4 years old<br/>Year 2016 (cases per 100,000 person-years)</b>  |
|----------------|------------------------------------------------------------------------------------------------------|
| Austria        | 1592                                                                                                 |
| Belgium        | 1488                                                                                                 |
| Denmark        | 2017                                                                                                 |
| Finland        | 1776                                                                                                 |
| France         | 1730                                                                                                 |
| Germany        | 1244                                                                                                 |
| Greece         | 1554                                                                                                 |
| Hungary        | 1570                                                                                                 |
| Ireland        | 2293                                                                                                 |
| Italy          | 1128                                                                                                 |
| Lithuania      | 1681                                                                                                 |
| Netherlands    | 1459                                                                                                 |
| Norway         | 2780                                                                                                 |
| Portugal       | 2487                                                                                                 |
| Spain          | 1382                                                                                                 |
| Sweden         | 2160                                                                                                 |
| Switzerland    | 1766                                                                                                 |
| United Kingdom | 2820                                                                                                 |
| <b>Country</b> | <b>Childhood asthma incidence rate 5-14 years old<br/>Year 2016 (cases per 100,000 person-years)</b> |
| Austria        | 514                                                                                                  |
| Belgium        | 479                                                                                                  |
| Denmark        | 676                                                                                                  |
| Finland        | 569                                                                                                  |
| France         | 583                                                                                                  |
| Germany        | 470                                                                                                  |
| Greece         | 514                                                                                                  |
| Hungary        | 598                                                                                                  |
| Ireland        | 677                                                                                                  |

|                |     |
|----------------|-----|
| Italy          | 513 |
| Lithuania      | 722 |
| Netherlands    | 464 |
| Norway         | 821 |
| Portugal       | 744 |
| Spain          | 447 |
| Sweden         | 809 |
| Switzerland    | 561 |
| United Kingdom | 823 |

### **Estimation of the impact of exposure reduction scenarios**

We assessed the impacts of two plausible scenarios on the burden of incident childhood asthma:

1. Where in exceedance, the reduction of air pollution levels to comply with the World Health Organization (WHO) air quality guideline values [28]. This scenario was applicable to two of the three studied pollutants, as BC has no air quality guideline value:
  - a. **NO<sub>2</sub> reduced to 40 µg/m<sup>3</sup>** (annual average), where in exceedance;
  - b. **PM<sub>2.5</sub> reduced to 10 µg/m<sup>3</sup>** (annual average), where in exceedance.
2. Where in exceedance, the reduction of air pollution levels to meet the minimum air pollution levels recorded across any of the 41 studies synthesized in the underlying systematic review from which we sourced our exposure-response functions [6]:
  - a. **NO<sub>2</sub> reduced to 1.5 µg/m<sup>3</sup>** (annual average) as recorded in Oftedal, Nystad [46], where in exceedance;
  - b. **PM<sub>2.5</sub> reduced to 0.4 µg/m<sup>3</sup>** (annual average) as recorded in Fuertes, Standl [47], where in exceedance.
  - c. **BC reduced to 0.4 x 10<sup>-5</sup> m<sup>-1</sup>** (annual average) as recorded in Gehring, Wijga [48], where in exceedance;

### **Estimation of population attributable fraction and attributable number of cases**

Using the exposure-response functions shown in section 2.5.2, the risk estimates for asthma development in association with the three investigated pollutants were scaled to the difference in exposure level between the two counterfactual scenarios (section 2.5.3) and the reference scenario (current exposure as estimated from the LUR model). Each analysis was undertaken for each pollutant separately and at the 1 km x 1 km grid cell. To scale the risk estimate from the exposure-response functions' concentration unit to the exposure difference between the reference and the two counterfactual scenarios, standard methods were used [30], where:

$$RR_{\text{exposure\_difference}} = e^{\left( \left( \frac{\ln RR}{E_{RR\_unit}} \right) \times E_{\text{exposure\_difference}} \right)}$$

Where  $RR$  is the relative risk obtained from the exposure-response function for each pollutant (section 2.5.2.);

$E_{RR\_unit}$  is the exposure unit that corresponds to the  $RR$  obtained from the exposure-response function for each pollutant (section 2.5.2.);

$E_{exposure\_difference}$  is the difference in the exposure level between the counterfactual scenario (section 2.5.3.) and the reference scenario (current exposure);

$RR_{exposure\_difference}$  is the scaled relative risk that corresponds to the difference in exposure level between the counterfactual (section 2.5.3.) and reference (current exposure) scenarios.

Next, the population attributable fraction (PAF) was calculated, also for each 1 km x 1 km grid cell, pollutant and scenario. The PAF is an epidemiological measure that is widely used in BoD and health impact assessments to identify the fraction of all cases of a particular health outcome in a population that is attributable to a specific exposure [49]. As such, it defines the proportional reduction in morbidity that would occur if the specific exposure, to outdoor air pollution in this case, was reduced to the counterfactual exposure scenario(s):

$$PAF = \frac{\sum_{i=1}^n P (RR_{exposure\_difference} - 1)}{\sum_{i=1}^n P (RR_{exposure\_difference} - 1) + 1}$$

Where  $P$  is the proportion of the exposed population (100% assumed);

$RR_{exposure\_difference}$  is the previously scaled  $RR$  that corresponds to the difference in the exposure level between the counterfactual scenario (section 2.5.3.) and the reference scenario (current exposure);

$n$  is the number of exposure levels (1 in this case).

Finally, the number of incident childhood asthma cases attributable to the excess exposure compared to the counterfactual exposure scenarios was calculated as follows, separately for each cell, pollutant and scenario:

$$\text{Attributable number of asthma cases} = PAF * \text{expected asthma cases due to all causes}$$

Where:

$$\begin{aligned} & \text{Expected asthma cases due to all causes} \\ &= \text{childhood population} * \text{baseline childhood asthma incidence rate} \end{aligned}$$

The confidence intervals around the central values were estimated using the confidence intervals around the exposure-response functions, as provided by the underlying meta-analysis (Khreis et al. 2017). Confidence intervals were estimated for each cell, pollutant and scenario, and then added to estimate the total country values, as done for the central estimate.



## Supplementary Material – Results

Table S3: summary statistics for exposures in each of the 18 included countries

| Country        | NO <sub>2</sub> (µg/m <sup>3</sup> ) |      |      |       |        | PM <sub>2.5</sub> (µg/m <sup>3</sup> ) |      |       |       |        | BC (10 <sup>-5</sup> m <sup>-1</sup> ) |      |      |      |        |
|----------------|--------------------------------------|------|------|-------|--------|----------------------------------------|------|-------|-------|--------|----------------------------------------|------|------|------|--------|
|                | Mean                                 | sd   | min  | max   | median | mean                                   | sd   | min   | max   | median | mean                                   | sd   | min  | max  | median |
| Austria        | 13.86                                | 4.98 | 2.34 | 44    | 13.62  | 14.72                                  | 3.86 | 2.05  | 41.1  | 15.14  | 1.42                                   | 0.2  | 0.75 | 2.84 | 1.42   |
| Belgium        | 21.5                                 | 5.72 | 7.6  | 56.36 | 21.47  | 16.42                                  | 2.32 | 8.52  | 22.29 | 17.05  | 1.48                                   | 0.23 | 0.98 | 2.97 | 1.46   |
| Denmark        | 10.33                                | 3.35 | 3.68 | 42.76 | 9.69   | 10.61                                  | 1.25 | 5.87  | 19.13 | 10.57  | 0.67                                   | 0.16 | 0.15 | 2.3  | 0.66   |
| Finland        | 4.6                                  | 3.02 | 1.4  | 36.66 | 3.86   | 4.53                                   | 1.53 | 2.05  | 31.74 | 4.37   | 0.1                                    | 0.14 | 0    | 1.67 | 0.05   |
| France         | 11.34                                | 4.58 | 1.4  | 58.42 | 10.51  | 13.17                                  | 2.26 | 2.05  | 28.01 | 13.32  | 1.21                                   | 0.18 | 0.81 | 3.39 | 1.18   |
| Germany        | 16.53                                | 5.01 | 3.7  | 50.99 | 15.65  | 14.33                                  | 2.15 | 2.76  | 23.46 | 14.28  | 1.24                                   | 0.22 | 0.65 | 2.74 | 1.23   |
| Greece         | 8.6                                  | 5.39 | 1.4  | 60.89 | 7.6    | 14.14                                  | 3.03 | 3.13  | 23.26 | 14.27  | 1.64                                   | 0.19 | 1.28 | 3.48 | 1.62   |
| Hungary        | 11.52                                | 3.74 | 3.57 | 39.39 | 10.69  | 18.4                                   | 1.37 | 11.58 | 23.75 | 18.42  | 1.47                                   | 0.13 | 1.19 | 2.66 | 1.44   |
| Ireland        | 6.48                                 | 2.64 | 1.4  | 37.71 | 6.37   | 7.12                                   | 1.11 | 2.38  | 13.16 | 7.32   | 0.43                                   | 0.11 | 0.14 | 1.92 | 0.43   |
| Italy          | 14.49                                | 7.23 | 1.4  | 63.96 | 12.74  | 15.34                                  | 5.24 | 2.05  | 31.15 | 14.01  | 1.56                                   | 0.24 | 0.82 | 3.33 | 1.51   |
| Lithuania      | 7.17                                 | 2.11 | 2.1  | 28.29 | 6.97   | 11.9                                   | 1.59 | 6.98  | 17.29 | 11.91  | 0.73                                   | 0.12 | 0.48 | 1.89 | 0.73   |
| Netherlands    | 21.19                                | 6.06 | 7.27 | 51.99 | 20.84  | 15.37                                  | 1.6  | 8.22  | 22.35 | 15.53  | 1.24                                   | 0.23 | 0.67 | 2.75 | 1.22   |
| Norway         | 5.37                                 | 3.84 | 1.4  | 39.2  | 4.3    | 4.6                                    | 2.06 | 2.05  | 12.98 | 4.19   | 0.14                                   | 0.17 | 0    | 1.81 | 0.08   |
| Portugal       | 9.98                                 | 4.98 | 1.61 | 45.47 | 8.68   | 8.36                                   | 1.98 | 2.05  | 15.75 | 8.38   | 1.41                                   | 0.18 | 1.06 | 3.11 | 1.38   |
| Spain          | 11.45                                | 6.5  | 1.4  | 69.98 | 9.81   | 9.28                                   | 2.78 | 2.05  | 19.8  | 9.24   | 1.45                                   | 0.26 | 0.99 | 3.74 | 1.4    |
| Sweden         | 5.14                                 | 3.58 | 1.4  | 41.18 | 4.24   | 5.37                                   | 2.2  | 2.05  | 21.06 | 5.24   | 0.29                                   | 0.22 | 0    | 1.86 | 0.29   |
| Switzerland    | 13.47                                | 5.57 | 1.78 | 47.29 | 13.22  | 12.55                                  | 3.05 | 2.05  | 25.34 | 13.02  | 1.33                                   | 0.22 | 0.83 | 2.7  | 1.32   |
| United Kingdom | 15.37                                | 7.04 | 1.4  | 55.45 | 14.74  | 9.99                                   | 2.34 | 2.05  | 18.32 | 10.47  | 0.8                                    | 0.32 | 0    | 2.46 | 0.81   |

Abbreviations: NO<sub>2</sub>: Nitrogen Dioxide; PM<sub>2.5</sub>: Particulate Matter equal or less than 2.5 micrometers in diameter; BC: PM<sub>2.5</sub> absorbance/ black carbon

Table S4: burden of disease results with WHO air quality guidelines scenario – young children between 1 and 4 years old

| Country        | Children population assessed (#) | NO <sub>2</sub> – WHO guideline value*                              |                             |      |       | PM <sub>2.5</sub> – WHO guideline value**                           |                             |        |        |
|----------------|----------------------------------|---------------------------------------------------------------------|-----------------------------|------|-------|---------------------------------------------------------------------|-----------------------------|--------|--------|
|                |                                  | Percentage of total cases attributable to the exposure scenario (%) | Attributable expected cases | LCI  | UCI   | Percentage of total cases attributable to the exposure scenario (%) | Attributable expected cases | LCI    | UCI    |
| Austria        | 332,715                          | 0.09                                                                | 5                           | 2    | 6     | 19.66                                                               | 1,041                       | 383    | 1,584  |
| Belgium        | 510,857                          | 0.72                                                                | 55                          | 23   | 75    | 21.31                                                               | 1,620                       | 591    | 2,476  |
| Denmark        | 236,198                          | 0.01                                                                | 0.24                        | 0.10 | 0.33  | 5.81                                                                | 277                         | 96     | 444    |
| Finland        | 234,472                          | 0.00                                                                | 0.00                        | 0.00 | 0.00  | 0.19                                                                | 8                           | 3      | 13     |
| France         | 3,106,577                        | 0.62                                                                | 336                         | 140  | 457   | 16.67                                                               | 8,959                       | 3,249  | 13,789 |
| Germany        | 2,870,930                        | 0.10                                                                | 35                          | 15   | 48    | 16.11                                                               | 5,750                       | 2,066  | 8,920  |
| Greece         | 369,993                          | 0.81                                                                | 46                          | 19   | 63    | 18.32                                                               | 1,053                       | 382    | 1,619  |
| Hungary        | 358,812                          | 0.00                                                                | 0.00                        | 0.00 | 0.00  | 24.61                                                               | 1,387                       | 512    | 2,097  |
| Ireland        | 275,872                          | 0.00                                                                | 0.00                        | 0.00 | 0.00  | 0.46                                                                | 29                          | 10     | 47     |
| Italy          | 2,084,242                        | 0.56                                                                | 131                         | 55   | 178   | 20.84                                                               | 4,898                       | 1,834  | 7,333  |
| Lithuania      | 117,734                          | 0.00                                                                | 0.00                        | 0.00 | 0.00  | 10.79                                                               | 214                         | 75     | 337    |
| Netherlands    | 704,472                          | 0.42                                                                | 43                          | 18   | 59    | 18.01                                                               | 1,851                       | 667    | 2,863  |
| Norway         | 245,074                          | 0.00                                                                | 0.00                        | 0.00 | 0.00  | 0.83                                                                | 56                          | 19     | 92     |
| Portugal       | 340,041                          | 0.08                                                                | 6                           | 3    | 9     | 4.39                                                                | 371                         | 129    | 597    |
| Spain          | 1,764,634                        | 1.60                                                                | 391                         | 166  | 527   | 7.85                                                                | 1,915                       | 673    | 3,035  |
| Sweden         | 472,059                          | 0.00                                                                | 0.05                        | 0.02 | 0.06  | 1.10                                                                | 112                         | 39     | 180    |
| Switzerland    | 345,719                          | 0.02                                                                | 1.3                         | 0.5  | 1.8   | 14.17                                                               | 865                         | 309    | 1,349  |
| United Kingdom | 3,158,411                        | 0.27                                                                | 238                         | 99   | 325   | 6.81                                                                | 6,066                       | 2,112  | 9,693  |
| Total          | 17,528,813                       | 0.42                                                                | 1,288                       | 540  | 1,750 | 11.77                                                               | 36,471                      | 13,147 | 56,465 |

\* NO<sub>2</sub> reduced to 40 µg/m<sup>3</sup> (annual average), where in exceedance\*\* PM<sub>2.5</sub> reduced to 10 µg/m<sup>3</sup> (annual average), where in exceedanceAbbreviations: NO<sub>2</sub>: Nitrogen Dioxide; PM<sub>2.5</sub>: Particulate Matter equal or less than 2.5 micrometers in diameter; WHO: World Health Organization; LCI: Lower Confidence Interval; UCI: Upper Confidence Interval

Table S5: burden of disease results with WHO air quality guidelines scenario – children between 5 and 14 years old

| Country        | Children population assessed (#) | NO <sub>2</sub> – WHO guideline value*                              |                             |      |       | PM <sub>2.5</sub> – WHO guideline value**                           |                             |        |        |
|----------------|----------------------------------|---------------------------------------------------------------------|-----------------------------|------|-------|---------------------------------------------------------------------|-----------------------------|--------|--------|
|                |                                  | Percentage of total cases attributable to the exposure scenario (%) | Attributable expected cases | LCI  | UCI   | Percentage of total cases attributable to the exposure scenario (%) | Attributable expected cases | LCI    | UCI    |
| Austria        | 833,019                          | 0.11                                                                | 5                           | 2    | 6     | 24.32                                                               | 1,041                       | 383    | 1,584  |
| Belgium        | 1,277,143                        | 0.72                                                                | 44                          | 18   | 60    | 21.31                                                               | 1,304                       | 476    | 1,993  |
| Denmark        | 663,511                          | 0.01                                                                | 0.23                        | 0.09 | 0.31  | 5.81                                                                | 261                         | 90     | 418    |
| Finland        | 606,154                          | 0.00                                                                | 0.00                        | 0.00 | 0.00  | 0.19                                                                | 6                           | 2      | 10     |
| France         | 8,127,540                        | 0.62                                                                | 296                         | 124  | 403   | 16.67                                                               | 7,902                       | 2,865  | 12,162 |
| Germany        | 7,588,220                        | 0.10                                                                | 35                          | 15   | 48    | 5.79                                                                | 2,065                       | 8,916  | 8,920  |
| Greece         | 1,043,113                        | 0.81                                                                | 43                          | 18   | 59    | 18.32                                                               | 983                         | 357    | 1,511  |
| Hungary        | 960,739                          | 0.00                                                                | 0.00                        | 0.00 | 0.00  | 24.61                                                               | 1,414                       | 522    | 2,138  |
| Ireland        | 690,175                          | 0.00                                                                | 0.00                        | 0.00 | 0.00  | 0.46                                                                | 21                          | 7      | 35     |
| Italy          | 5,706,853                        | 0.56                                                                | 163                         | 69   | 222   | 20.84                                                               | 6,103                       | 2,285  | 9,137  |
| Lithuania      | 273,196                          | 0.00                                                                | 0.00                        | 0.00 | 0.00  | 10.79                                                               | 213                         | 75     | 336    |
| Netherlands    | 1,920,765                        | 0.42                                                                | 37                          | 15   | 51    | 18.01                                                               | 1,605                       | 578    | 2,484  |
| Norway         | 628,416                          | 0.00                                                                | 0.00                        | 0.00 | 0.00  | 0.83                                                                | 43                          | 15     | 69     |
| Portugal       | 1,048,336                        | 0.08                                                                | 6                           | 2    | 8     | 4.39                                                                | 342                         | 119    | 550    |
| Spain          | 4,815,022                        | 1.60                                                                | 345                         | 146  | 465   | 7.85                                                                | 1,688                       | 593    | 2,676  |
| Sweden         | 1,156,855                        | 0.00                                                                | 0.04                        | 0.02 | 0.06  | 1.10                                                                | 103                         | 36     | 165    |
| Switzerland    | 827,086                          | 0.02                                                                | 0.98                        | 0.40 | 1.35  | 14.17                                                               | 657                         | 235    | 1,025  |
| United Kingdom | 7,747,461                        | 0.27                                                                | 170                         | 71   | 233   | 6.81                                                                | 4,343                       | 1,512  | 6,940  |
| Total          | 45,913,606                       | 0.43                                                                | 1,146                       | 480  | 1,557 | 11.16                                                               | 30,095                      | 19,065 | 52,152 |

\* NO<sub>2</sub> reduced to 40 µg/m<sup>3</sup> (annual average), where in exceedance\*\* PM<sub>2.5</sub> reduced to 10 µg/m<sup>3</sup> (annual average), where in exceedanceAbbreviations: NO<sub>2</sub>: Nitrogen Dioxide; PM<sub>2.5</sub>: Particulate Matter equal or less than 2.5 micrometers in diameter; WHO: World Health Organization; LCI: Lower Confidence Interval; UCI: Upper Confidence Interval

Table S6: burden of disease results with minimum air pollution levels scenario – young children between 1 and 4 years old

| Country        | Children population assessed (#) | NO <sub>2</sub> *                                                   |                             |        |        | PM <sub>2.5</sub> **                                                |                             |        |         | BC***                                                               |                             |        |        |
|----------------|----------------------------------|---------------------------------------------------------------------|-----------------------------|--------|--------|---------------------------------------------------------------------|-----------------------------|--------|---------|---------------------------------------------------------------------|-----------------------------|--------|--------|
|                |                                  | Percentage of total cases attributable to the exposure scenario (%) | Attributable expected cases | LCI    | UCI    | Percentage of total cases attributable to the exposure scenario (%) | Attributable expected cases | LCI    | UCI     | Percentage of total cases attributable to the exposure scenario (%) | Attributable expected cases | LCI    | UCI    |
| Austria        | 332,715                          | 23                                                                  | 1,194                       | 528    | 1,569  | 39                                                                  | 2,076                       | 824    | 2,949   | 19                                                                  | 1,008                       | 415    | 1,590  |
| Belgium        | 510,857                          | 29                                                                  | 2,178                       | 981    | 2,830  | 41                                                                  | 3,098                       | 1,230  | 4,392   | 19                                                                  | 1,466                       | 603    | 2,315  |
| Denmark        | 236,198                          | 19                                                                  | 908                         | 397    | 1,202  | 29                                                                  | 1,380                       | 519    | 2,052   | 9                                                                   | 420                         | 167    | 685    |
| Finland        | 234,472                          | 14                                                                  | 589                         | 253    | 787    | 18                                                                  | 753                         | 272    | 1,162   | 3                                                                   | 119                         | 47     | 197    |
| France         | 3,106,577                        | 23                                                                  | 12,157                      | 5,408  | 15,922 | 37                                                                  | 19,999                      | 7,839  | 28,697  | 18                                                                  | 9,522                       | 3,911  | 15,059 |
| Germany        | 2,870,930                        | 24                                                                  | 8,451                       | 3,738  | 11,102 | 37                                                                  | 13,147                      | 5,129  | 18,932  | 16                                                                  | 5,617                       | 2,281  | 8,990  |
| Greece         | 369,993                          | 22                                                                  | 1,246                       | 560    | 1,623  | 38                                                                  | 2,208                       | 869    | 3,156   | 23                                                                  | 1,321                       | 552    | 2,050  |
| Hungary        | 358,812                          | 18                                                                  | 1,001                       | 434    | 1,331  | 43                                                                  | 2,436                       | 979    | 3,420   | 18                                                                  | 1,000                       | 408    | 1,590  |
| Ireland        | 275,872                          | 14                                                                  | 863                         | 371    | 1,154  | 22                                                                  | 1,365                       | 498    | 2,086   | 5                                                                   | 321                         | 127    | 527    |
| Italy          | 2,084,242                        | 24                                                                  | 5,574                       | 2,484  | 7,291  | 40                                                                  | 9,479                       | 3,802  | 13,358  | 20                                                                  | 4,817                       | 1,990  | 7,567  |
| Lithuania      | 117,734                          | 14                                                                  | 276                         | 118    | 370    | 33                                                                  | 649                         | 249    | 950     | 9                                                                   | 183                         | 73     | 300    |
| Netherlands    | 704,472                          | 29                                                                  | 3,028                       | 1,366  | 3,929  | 38                                                                  | 3,932                       | 1,542  | 5,636   | 16                                                                  | 1,676                       | 682    | 2,677  |
| Norway         | 245,074                          | 15                                                                  | 990                         | 428    | 1,319  | 19                                                                  | 1,322                       | 481    | 2,025   | 3                                                                   | 212                         | 84     | 350    |
| Portugal       | 340,041                          | 21                                                                  | 1,749                       | 770    | 2,305  | 27                                                                  | 2,282                       | 853    | 3,415   | 19                                                                  | 1,619                       | 666    | 2,557  |
| Spain          | 1,764,634                        | 25                                                                  | 6,035                       | 2,719  | 7,846  | 30                                                                  | 7,317                       | 2,774  | 10,808  | 21                                                                  | 5,166                       | 2,142  | 8,083  |
| Sweden         | 472,059                          | 16                                                                  | 1,582                       | 685    | 2,107  | 20                                                                  | 2,038                       | 743    | 3,119   | 5                                                                   | 465                         | 184    | 768    |
| Switzerland    | 345,719                          | 22                                                                  | 1,316                       | 579    | 1,736  | 35                                                                  | 2,150                       | 833    | 3,114   | 17                                                                  | 1,054                       | 430    | 1,677  |
| United Kingdom | 3,158,411                        | 26                                                                  | 23,361                      | 10,447 | 30,486 | 29                                                                  | 26,163                      | 9,871  | 38,803  | 13                                                                  | 11,153                      | 4,499  | 17,981 |
| Total          | 17,528,813                       | 23                                                                  | 72,497                      | 32,265 | 94,910 | 33                                                                  | 101,792                     | 39,307 | 148,074 | 15                                                                  | 47,139                      | 19,262 | 74,962 |

\* NO<sub>2</sub> reduced to 1.5 µg/m<sup>3</sup> (annual average) as recorded in Oftedal et al, (2009), where in exceedance

\*\* PM<sub>2.5</sub> reduced to 0.4 µg/m<sup>3</sup> (annual average) as recorded in Fuertes et al, (2013), where in exceedance

\*\*\* BC reduced to 0.4 x 10<sup>-5</sup>m<sup>-1</sup> (annual average) as recorded in Gehring et al, (2015), where in exceedance

Abbreviations: NO<sub>2</sub>: Nitrogen Dioxide; PM<sub>2.5</sub>: Particulate Matter equal or less than 2.5 micrometers in diameter; BC: PM<sub>2.5</sub> absorbance/ black carbon; WHO: World Health Organization; LCI: Lower Confidence Interval; UCI: Upper Confidence Interval

Table S7: burden of disease results with minimum air pollution levels scenario – children between 5 and 14 years old

| Country        | Children population assessed (#) | NO <sub>2</sub> *                                                   |                             |        |        | PM <sub>2.5</sub> **                                                |                             |        |         | BC***                                                               |                             |        |        |
|----------------|----------------------------------|---------------------------------------------------------------------|-----------------------------|--------|--------|---------------------------------------------------------------------|-----------------------------|--------|---------|---------------------------------------------------------------------|-----------------------------|--------|--------|
|                |                                  | Percentage of total cases attributable to the exposure scenario (%) | Attributable expected cases | LCI    | UCI    | Percentage of total cases attributable to the exposure scenario (%) | Attributable expected cases | LCI    | UCI     | Percentage of total cases attributable to the exposure scenario (%) | Attributable expected cases | LCI    | UCI    |
| Austria        | 833,019                          | 23                                                                  | 965                         | 427    | 1,268  | 39                                                                  | 1,679                       | 666    | 2,384   | 19                                                                  | 815                         | 336    | 1,286  |
| Belgium        | 1,277,143                        | 29                                                                  | 1,753                       | 789    | 2,278  | 41                                                                  | 2,493                       | 990    | 3,535   | 19                                                                  | 1,180                       | 485    | 1,863  |
| Denmark        | 663,511                          | 19                                                                  | 855                         | 374    | 1,132  | 29                                                                  | 1,300                       | 489    | 1,933   | 9                                                                   | 395                         | 158    | 646    |
| Finland        | 606,154                          | 14                                                                  | 488                         | 210    | 653    | 18                                                                  | 624                         | 225    | 964     | 3                                                                   | 99                          | 39     | 163    |
| France         | 8,127,540                        | 23                                                                  | 10,723                      | 4,770  | 14,044 | 37                                                                  | 17,639                      | 6,914  | 25,311  | 18                                                                  | 8,399                       | 3,450  | 13,282 |
| Germany        | 7,588,220                        | 24                                                                  | 8,447                       | 3,736  | 11,097 | 37                                                                  | 13,140                      | 5,127  | 18,922  | 16                                                                  | 5,614                       | 2,280  | 8,985  |
| Greece         | 1,043,113                        | 22                                                                  | 1,163                       | 522    | 1,515  | 38                                                                  | 2,060                       | 811    | 2,945   | 23                                                                  | 1,232                       | 515    | 1,913  |
| Hungary        | 960,739                          | 18                                                                  | 1,020                       | 442    | 1,357  | 43                                                                  | 2,484                       | 998    | 3,487   | 18                                                                  | 1,019                       | 416    | 1,622  |
| Ireland        | 690,175                          | 14                                                                  | 637                         | 274    | 852    | 22                                                                  | 1,008                       | 368    | 1,541   | 5                                                                   | 237                         | 94     | 389    |
| Italy          | 5,706,853                        | 24                                                                  | 6,945                       | 3,095  | 9,085  | 40                                                                  | 11,811                      | 4,737  | 16,645  | 20                                                                  | 6,002                       | 2,480  | 9,429  |
| Lithuania      | 273,196                          | 14                                                                  | 275                         | 117    | 369    | 33                                                                  | 647                         | 248    | 947     | 9                                                                   | 183                         | 73     | 299    |
| Netherlands    | 1,920,765                        | 29                                                                  | 2,627                       | 1,185  | 3,408  | 38                                                                  | 3,411                       | 1,338  | 4,889   | 16                                                                  | 1,454                       | 591    | 2,322  |
| Norway         | 628,416                          | 15                                                                  | 750                         | 324    | 1,000  | 19                                                                  | 1,001                       | 365    | 1,534   | 3                                                                   | 161                         | 64     | 265    |
| Portugal       | 1,048,336                        | 21                                                                  | 1,613                       | 710    | 2,125  | 27                                                                  | 2,105                       | 787    | 3,149   | 19                                                                  | 1,493                       | 614    | 2,358  |
| Spain          | 4,815,022                        | 25                                                                  | 5,321                       | 2,398  | 6,919  | 30                                                                  | 6,452                       | 2,446  | 9,531   | 21                                                                  | 4,555                       | 1,889  | 7,128  |
| Sweden         | 1,156,855                        | 16                                                                  | 1,453                       | 629    | 1,934  | 20                                                                  | 1,871                       | 682    | 2,863   | 5                                                                   | 427                         | 169    | 705    |
| Switzerland    | 827,086                          | 22                                                                  | 1,000                       | 440    | 1,319  | 35                                                                  | 1,633                       | 633    | 2,366   | 17                                                                  | 801                         | 327    | 1,274  |
| United Kingdom | 7,747,461                        | 26                                                                  | 16,727                      | 7,480  | 21,828 | 29                                                                  | 18,732                      | 7,068  | 27,783  | 13                                                                  | 7,986                       | 3,221  | 12,874 |
| Total          | 45,913,606                       | 23                                                                  | 62,761                      | 27,923 | 82,183 | 33                                                                  | 90,091                      | 34,891 | 130,728 | 16                                                                  | 42,052                      | 17,200 | 66,802 |

\* NO<sub>2</sub> reduced to 1.5 µg/m<sup>3</sup> (annual average) as recorded in Oftedal et al, (2009), where in exceedance

\*\* PM<sub>2.5</sub> reduced to 0.4 µg/m<sup>3</sup> (annual average) as recorded in Fuertes et al, (2013), where in exceedance

\*\*\* BC reduced to 0.4 x 10<sup>-5</sup>m<sup>-1</sup> (annual average) as recorded in Gehring et al, (2015), where in exceedance

Abbreviations: NO<sub>2</sub>: Nitrogen Dioxide; PM<sub>2.5</sub>: Particulate Matter equal or less than 2.5 micrometers in diameter; BC: PM<sub>2.5</sub> absorbance/ black carbon; WHO: World Health Organization; LCI: Lower Confidence Interval; UCI: Upper Confidence Interval

## References

1. Global Asthma Network, G., *The global asthma report 2014*. Auckland, New Zealand, 2014. **769**.
2. Gasana, J., et al., *Motor vehicle air pollution and asthma in children: a meta-analysis*. Environmental Research, 2012. **117**: p. 36-45.
3. Gaffin, J. and W. Phipatanakul, *Beta-2-Adrenergic Receptor Methylation may influence Asthma Phenotype in The School Inner City Asthma Study*. Receptors & Clinical Investigation, 2014. **1**(1): p. doi: 10.14800/rci. 15.
4. Asher, I. and N. Pearce, *Global burden of asthma among children*. The international journal of tuberculosis and lung disease, 2014. **18**(11): p. 1269-1278.
5. Gibson, G.J., et al., *Respiratory health and disease in Europe: the new European Lung White Book*. 2013, Eur Respiratory Soc.
6. Khreis, H., et al., *Exposure to Traffic-related Air Pollution and Risk of Development of Childhood Asthma: A Systematic Review and Meta-analysis*. Environment International, 2017. **100**: p. 1-31.
7. Richmond-Bryant, J., et al., *Associations of PM2. 5 and black carbon concentrations with traffic, idling, background pollution, and meteorology during school dismissals*. Science of the Total Environment, 2009. **407**(10): p. 3357-3364.
8. Anderson, H., G. Favarato, and R. Atkinson, *Long-term exposure to outdoor air pollution and the prevalence of asthma: meta-analysis of multi-community prevalence studies*. Air Qual Atmos Health 2013; 6: 57–68. Nishimura KK, Galanter JM, Roth LA, et al. *Early life air pollution and asthma risk in minority children: the GALA II & SAGE II studies*. Am J Respir Crit Care Med, 2011. **188**: p. 309-318.
9. Anderson, H.R., G. Favarato, and R.W. Atkinson, *Long-term exposure to air pollution and the incidence of asthma: meta-analysis of cohort studies*. Air Quality, Atmosphere & Health, 2013. **6**(1): p. 47-56.
10. Rice, M.B., et al., *Lifetime air pollution exposure and asthma in a pediatric birth cohort*. Journal of Allergy and Clinical Immunology, 2018.
11. Pennington, A.F., et al., *Exposure to mobile source air pollution in early-life and childhood asthma incidence: the Kaiser Air Pollution and Pediatric Asthma Study*. Epidemiology, 2018. **29**(1): p. 22-30.
12. Rancière, F., et al., *Early exposure to traffic-related air pollution, respiratory symptoms at 4 years of age, and potential effect modification by parental allergy, stressful family events, and sex: a prospective follow-up study of the PARIS birth cohort*. Environmental health perspectives, 2016. **125**(4): p. 737-745.
13. Tétreault, L.-F., et al., *Childhood exposure to ambient air pollutants and the onset of asthma: an administrative cohort study in Québec*. Environmental health perspectives, 2016. **124**(8): p. 1276-1282.
14. Esposito, S., et al., *Possible molecular mechanisms linking air pollution and asthma in children*. BMC pulmonary medicine, 2014. **14**(1): p. 31.
15. Gowers, A.M., et al., *Does outdoor air pollution induce new cases of asthma? Biological plausibility and evidence; a review*. Respiriology, 2012. **17**(6): p. 887-898.
16. Künzli, N., et al., *An attributable risk model for exposures assumed to cause both chronic disease and its exacerbations*. Epidemiology, 2008. **19**(2): p. 179-185.
17. Perez, L., et al., *Chronic burden of near-roadway traffic pollution in 10 European cities (APHEKOM network)*. European Respiratory Journal, 2013. **42**: p. 594-605.
18. Perez, L., et al., *Global goods movement and the local burden of childhood asthma in southern California*. American Journal of Public Health, 2009. **99**(S3): p. S622-S628.

19. Perez, L., et al., *Near-Roadway Pollution and Childhood Asthma: Implications for Developing “Win–Win” Compact Urban Development and Clean Vehicle Strategies*. Environmental health perspectives, 2012. **120**(11): p. 1619.
20. Khreis, H., K. de Hoogh, and M. Nieuwenhuijsen, *Full-Chain Health Impact Assessment of Traffic-Related Air Pollution and Childhood Asthma*. Environment International, 2018. **Available online 27 March 2018**.
21. Khreis, H., et al., *Traffic-Related Air Pollution and the Local Chronic Burden of Childhood Asthma in Bradford, UK*. International Journal of Transportation Science and Technology, 2019. **8**(2): p. 116-128.
22. Khreis, H., et al., *Traffic-Related Air Pollution and the Local Burden of Childhood Asthma in Bradford, UK*. Int J Transp Sci Technol, 2018. **accepted**.
23. Alotaibi, R., et al., *Traffic related air pollution and the burden of childhood asthma in the contiguous United States in 2000 and 2010*. Environment international, 2019.
24. de Hoogh, K., et al., *Spatial PM<sub>2.5</sub>, NO<sub>2</sub>, O<sub>3</sub> and BC models for Western Europe—Evaluation of spatiotemporal stability*. Environment international, 2018. **120**: p. 81-92.
25. Wang, M., et al., *A new technique for evaluating land use regression models and their impact on health effect estimates*. Epidemiology (Cambridge, Mass.), 2016. **27**(1): p. 51.
26. World Health Organization, W.H.O. *Quantitative assessment of environmental health impacts at population level*. 2015 [cited 2017 12 January]; Available from: <http://www.who.int/heli/tools/quantassess/en/>.
27. Vos, T., et al., *Global, regional, and national incidence, prevalence, and years lived with disability for 328 diseases and injuries for 195 countries, 1990–2016: a systematic analysis for the Global Burden of Disease Study 2016*. The Lancet, 2017. **390**(10100): p. 1211-1259.
28. World Health Organization, W., *WHO Air quality guidelines for particulate matter, ozone, nitrogen dioxide and sulfur dioxide-Global update 2005-Summary of risk assessment*, 2006. Geneva: WHO, 2006.
29. Health Effects Institute, H.E.I., *Traffic-related air pollution: a critical review of the literature on emissions, exposure, and health effects*. 2010: Special Report 17. HEI Panel on the Health Effects of Traffic-Related Air Pollution. Health Effects Institute, Boston, Massachusetts, 2010.
30. Rojas-Rueda, D., et al., *Replacing car trips by increasing bike and public transport in the greater Barcelona metropolitan area: a health impact assessment study*. Environment international, 2012. **49**: p. 100-109.
31. Briggs, N.L. and C.M. Long, *Critical review of black carbon and elemental carbon source apportionment in Europe and the United States*. Atmospheric Environment, 2016. **144**: p. 409-427.
32. Roorda-Knappe, M.C., et al., *Air pollution from traffic in city districts near major motorways*. Atmospheric Environment, 1998. **32**(11): p. 1921-1930.
33. Achakulwisut, P., et al., *Global, national, and urban burdens of paediatric asthma incidence attributable to ambient NO<sub>2</sub> pollution: estimates from global datasets*. The Lancet Planetary Health, 2019.
34. McConnell, R., et al., *Traffic, susceptibility, and childhood asthma Environ Health Perspect 114: 766–772*. Find this article online, 2006.
35. Park, Y.M. and M.-P. Kwan, *Individual exposure estimates may be erroneous when spatiotemporal variability of air pollution and human mobility are ignored*. Health & place, 2017. **43**: p. 85-94.
36. Nieuwenhuijsen, M.J., et al., *Variability in and agreement between modeled and personal continuously measured black carbon levels using novel smartphone and sensor technologies*. Environmental science & technology, 2015. **49**(5): p. 2977-2982.



37. McConnell, R., et al., *Childhood incident asthma and traffic-related air pollution at home and school*. Environmental Health Perspectives, 2010. **118**(7): p. 1021.
38. American Thoracic Society, A.T.S., *Report on the American Thoracic Society Workshop on Outdoor Air Pollution and New-Onset Airway Disease*. Under Review, 2019.
39. Zhu, Y., et al., *Study of ultrafine particles near a major highway with heavy-duty diesel traffic*. Atmospheric Environment, 2002. **36**(27): p. 4323-4335.
40. Cyrys, J., et al., *Variation of NO<sub>2</sub> and NO<sub>x</sub> concentrations between and within 36 European study areas: results from the ESCAPE study*. Atmospheric Environment, 2012. **62**: p. 374-390.
41. Eeftens, M., et al., *Spatial variation of PM<sub>2.5</sub>, PM<sub>10</sub>, PM<sub>2.5</sub> absorbance and PM<sub>coarse</sub> concentrations between and within 20 European study areas and the relationship with NO<sub>2</sub>—Results of the ESCAPE project*. Atmospheric Environment, 2012. **62**: p. 303-317.
42. Khreis, H., K. de Hoogh, and M.J. Nieuwenhuijsen, *Full-chain health impact assessment of traffic-related air pollution and childhood asthma*. Environment international, 2018. **114**: p. 365-375.
43. Brandt, S.J., et al., *Costs of childhood asthma due to traffic-related pollution in two California communities*. European Respiratory Journal, 2012. **40**(2): p. 363-370.
44. Khreis, H., A. May, and M. Nieuwenhuijsen, *Health impacts of urban transport policy measures: A guidance note for practice*. Journal of Transport & Health, 2017. **6**: p. 209-227.
45. de Hoogh, K., et al., *Development of West-European PM<sub>2.5</sub> and NO<sub>2</sub> land use regression models incorporating satellite-derived and chemical transport modelling data*. Environmental research, 2016. **151**: p. 1-10.
46. Oftedal, B., et al., *Long-term traffic-related exposures and asthma onset in schoolchildren in Oslo, Norway*. Environmental Health Perspectives, 2009. **117**(5): p. 839-844.
47. Fuertes, E., et al., *A longitudinal analysis of associations between traffic-related air pollution with asthma, allergies and sensitization in the GINplus and LISApplus birth cohorts*. PeerJ, 2013. **1**: p. e193.
48. Gehring, U., et al., *Exposure to air pollution and development of asthma and rhinoconjunctivitis throughout childhood and adolescence: a population-based birth cohort study*. The Lancet Respiratory Medicine, 2015. **3**(12): p. 933-942.
49. Mansournia, M.A. and D.G. Altman, *Population attributable fraction*. Bmj, 2018. **360**: p. k757.

Nomenclature of Territorial Units for Statistics, Eurostat, European commission, version 2010 [Online]. Available at: <http://ec.europa.eu/eurostat/web/gisco/geodata/reference-data/administrative-units-statistical-units>

Eurostat EFGS 2011, European Commission, GEOSTAT 2011 grid dataset [Online]. Available at: <http://ec.europa.eu/eurostat/web/gisco/geodata/reference-data/population-distribution-demography/geostat#geostat11>

Global Burden of Disease Collaborative Network. Global Burden of Disease Study Results (2016). Seattle, United States: Institute for Health Metrics and Evaluation (IHME). Available at: <http://ghdx.healthdata.org/gbd-results-tool>
