# Supplementary material
Source: HighWire-hosted journal article supplement (https://erj.ersjournals.com/content/54/4/1802194)
Supplement: inline-supplementary-material-2 [file inline-supplementary-material-2.pdf]

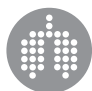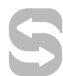

SHAREABLE PDF

# Outdoor air pollution and the burden of childhood asthma across Europe

Haneen Khreis<sup>1,2,3,4,9</sup>, Marta Cirach<sup>2,3,4</sup>, Natalie Mueller<sup>2,3,4</sup>, Kees de Hoogh<sup>5,6</sup>, Gerard Hoek<sup>7</sup>, Mark J. Nieuwenhuijsen<sup>2,3,4</sup> and David Rojas-Rueda<sup>2,3,8,9</sup> 

**Affiliations:** <sup>1</sup>Center for Advancing Research in Transportation Emissions, Energy, and Health (CARTEEH), Texas A&M Transportation Institute (TTI), College Station, TX, USA. <sup>2</sup>ISGlobal, Centre for Research in Environmental Epidemiology (CREAL), Barcelona, Spain. <sup>3</sup>Universitat Pompeu Fabra (UPF), Barcelona, Spain. <sup>4</sup>CIBER Epidemiología y Salud Pública (CIBERESP), Madrid, Spain. <sup>5</sup>Swiss Tropical and Public Health Institute, Basel, Switzerland. <sup>6</sup>University of Basel, Basel, Switzerland. <sup>7</sup>Division of Environmental Epidemiology, Institute for Risk Assessment Sciences, Utrecht University, Utrecht, The Netherlands. <sup>8</sup>Environmental and Radiological Health Sciences, Colorado State University, Fort Collins, CO, USA. <sup>9</sup>These authors are joint lead authors of the study.

**Correspondence:** Haneen Khreis, Center for Advancing Research in Transportation Emissions, Energy, and Health (CARTEEH), Texas A&M Transportation Institute (TTI), 2929 Research Parkway, 3135 TAMU, College Station, TX 77843-3135, USA. E-mail: h-khreis@tti.tamu.edu

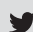

@ERSpublications

**A significant proportion (up to 33%) of incident childhood asthma cases across Europe may be attributable to outdoor air pollution. These cases are largely preventable, underlying an urgent need to reduce children's exposure to NO<sub>2</sub>, PM<sub>2.5</sub> and black carbon.** <http://bit.ly/2SxGCv4>

**Cite this article as:** Khreis H, Cirach M, Mueller N, *et al.* Outdoor air pollution and the burden of childhood asthma across Europe. *Eur Respir J* 2019; 54: 1802194 [https://doi.org/10.1183/13993003.02194-2018].

This single-page version can be shared freely online.

## ABSTRACT

**Background:** Emerging evidence suggests that air pollution may contribute to childhood asthma development. We estimated the burden of incident childhood asthma that may be attributable to outdoor nitrogen dioxide (NO<sub>2</sub>), particulate matter  $\leq 2.5$   $\mu\text{m}$  in diameter (PM<sub>2.5</sub>) and black carbon (BC) in Europe.

**Methods:** We combined country-level childhood incidence rates and pooled exposure-response functions with childhood (age 1–14 years) population counts, and exposure estimates at 1 540 386 1 km $\times$ 1 km cells, across 18 European countries and 63 442 419 children. Annual average pollutant concentrations were obtained from a validated and harmonised European land-use regression model. We investigated two exposure reduction scenarios. For the first, we used recommended annual World Health Organization (WHO) air quality guideline values. For the second, we used the minimum air pollution levels recorded across 41 studies in the underlying meta-analysis.

**Results:** NO<sub>2</sub> ranged from 1.4 to 70.0  $\mu\text{g}\cdot\text{m}^{-3}$ , with a mean of 11.8  $\mu\text{g}\cdot\text{m}^{-3}$ . PM<sub>2.5</sub> ranged from 2.0 to 41.1  $\mu\text{g}\cdot\text{m}^{-3}$ , with a mean of 11.6  $\mu\text{g}\cdot\text{m}^{-3}$ . BC ranged from 0.003 to  $3.7\times 10^{-5}$   $\text{m}^{-1}$ , with a mean of  $1.0\times 10^{-5}$   $\text{m}^{-1}$ . Compliance with the NO<sub>2</sub> and PM<sub>2.5</sub> WHO guidelines was estimated to prevent 2434 (0.4%) and 66 567 (11%) incident cases, respectively. Meeting the minimum air pollution levels for NO<sub>2</sub> (1.5  $\mu\text{g}\cdot\text{m}^{-3}$ ), PM<sub>2.5</sub> (0.4  $\mu\text{g}\cdot\text{m}^{-3}$ ) and BC ( $0.4\times 10^{-5}$   $\text{m}^{-1}$ ) was estimated to prevent 135 257 (23%), 191 883 (33%) and 89 191 (15%) incident cases, respectively.

**Conclusions:** A significant proportion of childhood asthma cases may be attributable to outdoor air pollution and these cases could be prevented. Our estimates underline an urgent need to reduce children's exposure to air pollution.
